# Supplementary material
Source: PubMed Central journal article supplement (PMC9038640)
Supplement: NIHMS1750676-supplement-1.pdf [file NIHMS1750676-supplement-1.pdf]

Supplementary Table S1. Measured plasma biomarkers with lower detection limits and data classifications.

|               | <b>Lower detection limit</b> | <b>Data classification</b> |
|---------------|------------------------------|----------------------------|
| IL-12         | 5.869 pg/mL                  | Continuous                 |
| IL-5          | 0.646 pg/mL                  | Continuous                 |
| IL-17A        | 12.321 pg/mL                 | Continuous                 |
| IL-25         | 29.449 pg/mL                 | Continuous                 |
| IL-31         | 0.049 pg/mL                  | Continuous                 |
| IFN- $\alpha$ | 6.629 pg/mL                  | Continuous                 |
| IL-10         | 2.066 pg/mL                  | Continuous                 |
| IL-1 $\alpha$ | 4.912 pg/mL                  | Continuous                 |
| CCL11         | 16.358 pg/mL                 | Continuous                 |
| IL-4          | 0.65 pg/mL                   | Binomial                   |
| IL-22         | 12.336 pg/mL                 | Binomial                   |
| IL-6          | 0.478 pg/mL                  | Binomial                   |

Supplementary Table S2. Baseline demographics of prurigo nodularis patients and healthy controls. PN – prurigo nodularis; SD – standard deviation; WI-NRS – Worst-Itch Numeric Rating Scale; IGA – Investigator’s Global Assessment.

|                       | <b>PN (n=20)</b> | <b>Healthy control (n=15)</b> | <b>P-value</b> |
|-----------------------|------------------|-------------------------------|----------------|
| Age, mean $\pm$ SD    | 54.1 $\pm$ 14.9  | 51.9 $\pm$ 14.1               | 0.764          |
| Sex, % (n)            |                  |                               | 0.911          |
| Male                  | 25% (5)          | 27% (4)                       |                |
| Female                | 75% (15)         | 73% (11)                      |                |
| Race, % (n)           |                  |                               | 0.686          |
| Caucasian             | 40% (8)          | 33% (5)                       |                |
| African American      | 60% (12)         | 67% (10)                      |                |
| WI-NRS, mean $\pm$ SD | 9.0 $\pm$ 1.2    | 0 $\pm$ 0                     | < 0.001        |
| IGA                   | 3.3 $\pm$ 0.7    | 0 $\pm$ 0                     | < 0.001        |

Supplementary Table S3. Comparisons of plasma biomarkers between prurigo nodularis clusters. SD – standard deviation; IL – interleukin; IFN – interferon; CCL – C-C motif chemokine ligand

|                                                  | <b>Cluster 1</b> | <b>Cluster 2</b> | <b>P-value</b> |
|--------------------------------------------------|------------------|------------------|----------------|
| Continuous variables,<br>geometric mean $\pm$ SD |                  |                  |                |
| IL-12                                            | 4.36 $\pm$ 0.45  | 4.64 $\pm$ 0.45  | 0.1022         |
| IL-5                                             | 1.54 $\pm$ 0.55  | 1.98 $\pm$ 0.44  | <b>0.0366</b>  |
| IL-17A                                           | 3.80 $\pm$ 0.20  | 3.98 $\pm$ 0.18  | <b>0.0366</b>  |
| IL-25                                            | 4.65 $\pm$ 0.53  | 5.38 $\pm$ 0.45  | <b>0.0016</b>  |
| IL-31                                            | 5.60 $\pm$ 0.24  | 5.90 $\pm$ 0.52  | 0.0798         |
| IFN- $\alpha$                                    | 3.49 $\pm$ 0.19  | 4.19 $\pm$ 0.40  | <b>0.0004</b>  |
| IL-10                                            | 1.44 $\pm$ 0.94  | 2.68 $\pm$ 0.56  | <b>0.0030</b>  |
| IL-1 $\alpha$                                    | 1.35 $\pm$ 0.55  | 2.49 $\pm$ 0.57  | <b>0.0011</b>  |
| CCL11                                            | 3.74 $\pm$ 0.95  | 4.17 $\pm$ 0.59  | 0.2014         |
| Binary variables,<br>% positive (n)              |                  |                  |                |
| IL-4                                             | 22% (2)          | 91% (10)         | <b>0.0018</b>  |
| IL-22                                            | 11% (1)          | 82% (9)          | <b>0.0017</b>  |
| IL-6                                             | 33% (3)          | 82% (9)          | <b>0.0277</b>  |

Supplementary Table S4. Comparisons of plasma biomarkers for prurigo nodularis clusters vs. controls. SD – standard deviation; IL – interleukin; IFN – interferon; CCL – C-C motif chemokine ligand

|                                                  | Cluster 1       | Cluster 2       | Control         | Cluster 1<br>vs.<br>Control,<br>P-value | Cluster 2<br>vs.<br>Control,<br>P-value |
|--------------------------------------------------|-----------------|-----------------|-----------------|-----------------------------------------|-----------------------------------------|
| Continuous variables,<br>geometric mean $\pm$ SD |                 |                 |                 |                                         |                                         |
| IL-12                                            | 4.36 $\pm$ 0.45 | 4.64 $\pm$ 0.45 | 4.13 $\pm$ 0.42 | 0.2965                                  | <b>0.0102</b>                           |
| IL-5                                             | 1.54 $\pm$ 0.55 | 1.98 $\pm$ 0.44 | 1.44 $\pm$ 0.57 | 0.7883                                  | <b>0.0169</b>                           |
| IL-17A                                           | 3.80 $\pm$ 0.20 | 3.98 $\pm$ 0.18 | 3.61 $\pm$ 0.61 | 0.6333                                  | <b>0.0292</b>                           |
| IL-25                                            | 4.65 $\pm$ 0.53 | 5.38 $\pm$ 0.45 | 5.01 $\pm$ 1.03 | 0.1348                                  | 0.0816                                  |
| IL-31                                            | 5.60 $\pm$ 0.24 | 5.90 $\pm$ 0.52 | 5.06 $\pm$ 2.44 | 0.5909                                  | 0.2124                                  |
| IFN- $\alpha$                                    | 3.49 $\pm$ 0.19 | 4.19 $\pm$ 0.40 | 3.70 $\pm$ 0.60 | 0.1988                                  | <b>0.0355</b>                           |
| IL-10                                            | 1.44 $\pm$ 0.94 | 2.68 $\pm$ 0.56 | 1.44 $\pm$ 1.52 | 0.8554                                  | <b>0.0098</b>                           |
| IL-1 $\alpha$                                    | 1.35 $\pm$ 0.55 | 2.49 $\pm$ 0.57 | 1.87 $\pm$ 0.88 | 0.0843                                  | 0.0945                                  |
| Eotaxin                                          | 3.74 $\pm$ 0.95 | 4.17 $\pm$ 0.59 | 4.26 $\pm$ 0.69 | 0.2384                                  | 0.6461                                  |
| Binary variables,<br>% positive (n)              |                 |                 |                 |                                         |                                         |
| IL-4                                             | 22% (2)         | 91% (10)        | 47% (7)         | 0.2311                                  | <b>0.0191</b>                           |
| IL-22                                            | 11% (1)         | 82% (9)         | 60% (9)         | <b>0.0187</b>                           | 0.2337                                  |
| IL-6                                             | 33% (3)         | 82% (9)         | 60% (9)         | 0.2059                                  | 0.2337                                  |

Supplementary Table S5. Clinical characteristics of PN patients for each cluster. PN – prurigo nodularis; SD – standard deviation; WI-NRS – Worst-Itch Numeric Rating Scale; IGA – Investigator’s Global Assessment; DLQI – Dermatology Life Quality Index; BDI – Beck’s Depression Inventory

|                                   | <b>Cluster 1 (n=9)</b> | <b>Cluster 2 (n=11)</b> | <b>P-value</b> |
|-----------------------------------|------------------------|-------------------------|----------------|
| Age, mean ± SD                    | 53.7 ± 16.6            | 54.5 ± 14.2             | 0.7901         |
| Sex, % (n)                        |                        |                         | 0.1945         |
| Male                              | 11% (1)                | 36% (4)                 |                |
| Female                            | 89% (8)                | 64% (7)                 |                |
| Race                              |                        |                         | <b>0.0277</b>  |
| African American, % (n)           | 33% (3)                | 82% (9)                 |                |
| Caucasian, % (n)                  | 67% (6)                | 18% (2)                 |                |
| WI-NRS, mean ± SD                 | 8.3 ± 1.2              | 9.5 ± 0.9               | <b>0.0359</b>  |
| IGA, mean ± SD                    | 3.0 ± 0.7              | 3.4 ± 0.7               | 0.2432         |
| DLQI, mean ± SD                   | 13.0 ± 4.1             | 21.9 ± 6.4              | <b>0.0152</b>  |
| BDI score, mean ± SD              | 8.0 ± 7.8              | 19.5 ± 12.8             | 0.0651         |
| History of atopy, % (n)           | 11% (1)                | 27% (3)                 | 0.3690         |
| Spinal pathology, % (n)           | 67% (6)                | 18% (2)                 | <b>0.0277</b>  |
| Inflammatory comorbidities, % (n) | 44% (4)                | 55% (5)                 | 0.9640         |
| Immunomodulating drugs, % (n)     | 44% (4)                | 27% (3)                 | 0.4231         |
| Neuromodulating drugs, % (n)      | 55% (5)                | 27% (3)                 | 0.1990         |

Supplementary Table S6. Major comorbidity profiles and medication use at the time of blood draw for prurigo nodularis (PN) and healthy control patients. Doses are represented as weekly for methotrexate, daily for gabapentin, and biweekly for dupilumab. CKD – chronic kidney disease; T2DM – type 2 diabetes mellitus; HIV – human immunodeficiency virus; CHF – congestive heart failure.

| PN Cluster 1 (n=9) |        |                                               |                                 | PN Cluster 2 (n=11) |        |                                  |                              | Healthy Control (n=15) |        |               |             |
|--------------------|--------|-----------------------------------------------|---------------------------------|---------------------|--------|----------------------------------|------------------------------|------------------------|--------|---------------|-------------|
| Patient            | WI-NRS | Comorbidities                                 | Medications                     | Patient             | WI-NRS | Comorbidities                    | Medications                  | Patient                | WI-NRS | Comorbidities | Medications |
| 1                  | 10     | Thoracic spinal stenosis                      | Gabapentin, Dupilumab           | 1                   | 10     | Cervical spinal stenosis         | None                         | 1                      | 0      | None          | None        |
| 2                  | 9      | CKD                                           | None                            | 2                   | 10     | HIV                              | nbUVB                        | 2                      | 0      | None          | None        |
| 3                  | 10     | Cervical spinal stenosis                      | nbUVB, Methotrexate, Gabapentin | 3                   | 9      | T2DM                             | None                         | 3                      | 0      | None          | None        |
| 4                  | 9      | T2DM, CKD, spinal trauma                      | Gabapentin                      | 4                   | 9      | None                             | nbUVB, Gabapentin, Dupilumab | 4                      | 0      | None          | None        |
| 5                  | 7      | Spinal trauma                                 | None                            | 5                   | 10     | None                             | None                         | 5                      | 0      | T2DM          | None        |
| 6                  | 8      | Degenerative disc disease, multiple sclerosis | None                            | 6                   | 10     | None                             | None                         | 6                      | 0      | None          | None        |
| 7                  | 7      | Crohn's disease                               | nbUVB, Methotrexate             | 7                   | 10     | T2DM, CHF                        | Methotrexate, Gabapentin     | 7                      | 0      | None          | None        |
| 8                  | 7      | None                                          | nbUVB, Gabapentin               | 8                   | 10     | T2DM, cirrhosis                  | None                         | 8                      | 0      | None          | None        |
| 9                  | 8      | Cervical spinal stenosis                      | Gabapentin                      | 9                   | 7      | None                             | None                         | 9                      | 0      | T2DM          | None        |
|                    |        |                                               |                                 | 10                  | 9      | Hepatitis C                      | None                         | 10                     | 0      | T2DM, CKD     | None        |
|                    |        |                                               |                                 | 11                  | 10     | HIV, CHF, lumbar spinal stenosis | Gabapentin                   | 11                     | 0      | None          | None        |
|                    |        |                                               |                                 |                     |        |                                  |                              | 12                     | 0      | T2DM          | None        |
|                    |        |                                               |                                 |                     |        |                                  |                              | 13                     | 0      | None          | None        |
|                    |        |                                               |                                 |                     |        |                                  |                              | 14                     | 0      | CKD           | None        |
|                    |        |                                               |                                 |                     |        |                                  |                              | 15                     | 0      | None          | None        |
